# Supplementary material for: Wet-chemically prepared low-dimensional ZnO/Al2O3/Cr2O3nanoparticles for xanthine sensor development using an electrochemical method
Source: Royal Society of Chemistry journal article supplement (doi:10.1039/c8ra01734d), 2018-01-01
Supplement: c8ra01734d1.pdf [file c8ra01734d1.pdf]

### Elemental Supporting Materials

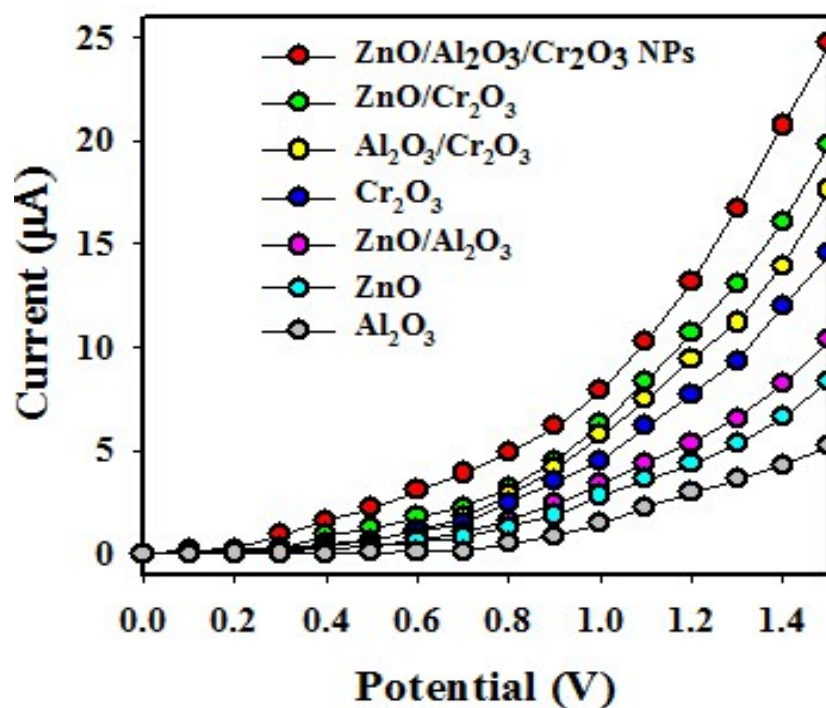

Fig. S1: Control experiment is performed based on different composition of fabricated GCE such as Al<sub>2</sub>O<sub>3</sub>, ZnO, Cr<sub>2</sub>O<sub>3</sub>, ZnO/Al<sub>2</sub>O<sub>3</sub>, Al<sub>2</sub>O<sub>3</sub>/Cr<sub>2</sub>O<sub>3</sub>, ZnO/Cr<sub>2</sub>O<sub>3</sub> and ZnO/Al<sub>2</sub>O<sub>3</sub>/Cr<sub>2</sub>O<sub>3</sub> nanoparticles.
